# Supplementary material for: Growth pattern of lumbar vertebrae and lumbosacral alignment during adolescence: a longitudinal study
Source: Research Square preprint supplement (doi:10.21203/rs.3.rs-8233900/v1), 2025-12-15
Supplement: Supplementary file 1 [file 2d71290e089077f04779609c.docx]

**Supplemental Table S1. Smooth‐term tests from generalized additive mixed models (GAMMs) for lumbosacral alignment and lumbar vertebral morphology**

| Variables | edf | F | p | q |
| --- | --- | --- | --- | --- |
| Lumbosacral alignment | | | | |
| LL | 2.50 | 0.88 | 0.25 | 0.25 |
| SS | 2.89 | 26.00 | <0.001 | <0.001 |
| Lumbar vertebral morphology | | | | |
| L1_AH | 2.28 | 166.19 | <0.001 | <0.001 |
| L2_AH | 2.73 | 142.31 | <0.001 | <0.001 |
| L3_AH | 2.81 | 114.42 | <0.001 | <0.001 |
| L4_AH | 2.77 | 126.95 | <0.001 | <0.001 |
| L5_AH | 2.56 | 122.73 | <0.001 | <0.001 |
| L1_PH | 2.83 | 134.07 | <0.001 | <0.001 |
| L2_PH | 2.11 | 201.09 | <0.001 | <0.001 |
| L3_PH | 2.92 | 187.20 | <0.001 | <0.001 |
| L4_PH | 2.78 | 188.73 | <0.001 | <0.001 |
| L5_PH | 2.93 | 206.63 | <0.001 | <0.001 |
| L1_SW | 1.00 | 125.40 | <0.001 | <0.001 |
| L2_SW | 1.49 | 92.81 | <0.001 | <0.001 |
| L3_SW | 1.00 | 147.71 | <0.001 | <0.001 |
| L4_SW | 1.90 | 71.56 | <0.001 | <0.001 |
| L5_SW | 2.07 | 70.32 | <0.001 | <0.001 |
| L1_IW | 1.00 | 105.87 | <0.001 | <0.001 |
| L2_IW | 1.00 | 127.36 | <0.001 | <0.001 |
| L3_IW | 1.00 | 120.86 | <0.001 | <0.001 |
| L4_IW | 1.00 | 120.03 | <0.001 | <0.001 |
| L5_IW | 1.00 | 153.96 | <0.001 | <0.001 |

LL, lumbar lordosis; SS, sacral slope

P-values were adjusted within the morphology family (20 tests) using the Benjamini–Hochberg FDR procedure (*q* = 0.05).
